# Supplementary material for: Baseline Blood Levels of Mucin-1 Are Associated with Crucial On-Treatment Adverse Outcomes in Patients with Idiopathic Pulmonary Fibrosis Receiving Antifibrotic Pirfenidone
Source: MDPI journal article supplement (doi:10.3390/biomedicines12020402), 2024-02-08
Supplement: s1 [file s1]

**Baseline blood levels of mucin-1 are associated with crucial on-treatment adverse outcomes in patients with idiopathic pulmonary fibrosis receiving antifibrotic pirfenidone**

Tang-Hsiu Huang, Sheng-Huan Wei, Hung-I Kuo, Hsin-Yu Hou, Chin-Wei Kuo, Yau-Lin Tseng, Sheng-Hsiang Lin, Chao-Liang Wu

## Supplementary Materials

**Corresponding Author:**

Chao-Liang Wu, PhD, Professor Emeritus

Address: Department of Biochemistry and Molecular Biology, College of Medicine, National Cheng Kung University,

Cheng-Hsing Campus, No.1, Dasyue Road, East District,

Tainan City 701, Taiwan

Telephone number: +886-6-2353535 ext. 5536 / Fax number: +886-6-2741692

E-mail: [wumolbio@mail.ncku.edu.tw](mailto:wumolbio@mail.ncku.edu.tw)

## **Table of Content**

| <b>Supplemental Material</b>                                                                                                                                                                                                  | <b>Page</b> |
|-------------------------------------------------------------------------------------------------------------------------------------------------------------------------------------------------------------------------------|-------------|
| <b>Supplemental Table S1.</b> Characteristics and outcomes of patients with and without on-treatment acute exacerbation of idiopathic pulmonary fibrosis (AE-IPF) during the follow-up period.                                | 3           |
| <b>Supplemental Table S2.</b> Cox proportional-hazards regression and subdistribution hazard regression on the risk of on-treatment acute exacerbation of idiopathic pulmonary fibrosis (AE-IPF) during the follow-up period. | 4           |
| <b>Supplemental Table S3.</b> Characteristics and outcomes of patients with and without on-treatment severe adverse outcomes (SAO) during the follow-up period.                                                               | 5           |
| <b>Supplemental Table S4.</b> Cox proportional-hazards regression on the risk of on-treatment early severe adverse outcomes (SAO).                                                                                            | 7           |
| <b>Supplemental Table S5.</b> Cox proportional-hazards regression on the risk of on-treatment severe adverse outcomes (SAO) anytime during the follow-up period.                                                              | 8           |
| <b>Supplemental Table S6.</b> Sensitivity analysis replacing “GAP stages” in all the multi-variable models with its individual constituting variables (sex, age, FVC, D <sub>LCO</sub> ).                                     | 9           |
| <b>Supplemental Figure S1.</b> Sensitivity analyses of the multi-variable Cox proportional hazards regression models for acute exacerbation of idiopathic pulmonary fibrosis (AE-IPF).                                        | 10          |
| <b>Supplemental Figure S2.</b> Sensitivity analyses of the multi-variable Cox proportional hazards regression models for early severe adverse outcomes (SAO).                                                                 | 11          |
| <b>Supplemental Figure S3.</b> Sensitivity analyses of the multi-variable Cox proportional hazards regression models for severe adverse outcomes (SAO) anytime during the follow-up period.                                   | 12          |
| <b>Appendix S1.</b> Formulae for the calculation of rates of changes in pulmonary functional parameters.                                                                                                                      | 13          |

**Supplemental Table S1.** Characteristics and outcomes of patients with and without on-treatment acute exacerbation of idiopathic pulmonary fibrosis (AE-IPF) during the follow-up period.

| Baseline characteristics and outcomes                       |                       | Without AE-IPF<br>(N = 50) | With AE-IPF<br>(N = 20) | P – value <sup>a</sup> |
|-------------------------------------------------------------|-----------------------|----------------------------|-------------------------|------------------------|
| Age, years                                                  |                       | 76.1 (± 9.3)               | 73.1 (± 9.8)            | 0.253                  |
| Sex                                                         | Female, n (%)         | 8 (16)                     | 4 (20)                  | 0.732                  |
|                                                             | Male, n (%)           | 42 (84)                    | 16 (80)                 |                        |
| Body mass index, kg/m <sup>2</sup>                          |                       | 23.9 (± 3.6)               | 22.6 (± 3.2)            | 0.189                  |
| Body surface area, m <sup>2</sup>                           |                       | 1.66 (± 0.17)              | 1.64 (± 0.14)           | 0.711                  |
| Cigarette smoking status                                    | Never smoker, n (%)   | 19 (38)                    | 6 (30)                  | 0.809                  |
|                                                             | Current smoker, n (%) | 5 (10)                     | 2 (10)                  |                        |
|                                                             | Former smoker, n (%)  | 26 (52)                    | 12 (60)                 |                        |
| Charlson comorbidity index                                  |                       | 5 (4 – 7)                  | 4 (3 – 6)               | 0.122                  |
| Echocardiographic evidence of pulmonary hypertension, n (%) |                       | 25 (50)                    | 10 (50)                 | 1.000                  |
| Baseline plasma mucin-1 level, ng/mL                        |                       | 1.34 (0.68 – 2.12)         | 3.88 (2.52 – 5.96)      | < 0.001                |
| Baseline FVC, L                                             |                       | 1.99 (± 0.50)              | 1.97 (± 0.54)           | 0.964                  |
| Baseline FVC, % predicted                                   |                       | 66 (± 10)                  | 64 (± 13)               | 0.482                  |
| Baseline D <sub>LCO</sub> , mmol/min/kPa                    |                       | 3.04 (± 1.21)              | 1.83 (± 0.76)           | < 0.001                |
| Baseline D <sub>LCO</sub> , % predicted                     |                       | 59 (± 22)                  | 35 (± 13)               | < 0.001                |
| Stages based on the GAP index                               | Stage 1, n (%)        | 11 (22)                    | 2 (10)                  | 0.035                  |
|                                                             | Stage 2, n (%)        | 34 (68)                    | 11 (55)                 |                        |
|                                                             | Stage 3, n (%)        | 5 (10)                     | 7 (35)                  |                        |
| Dosing Low (1200 mg/day), n (%)                             |                       | 31 (62)                    | 9 (45)                  | 0.285                  |
| High (1800 mg/day), n (%)                                   |                       | 19 (38)                    | 11 (55)                 |                        |
| On-treatment mortality, n (%)                               |                       | 12 (24)                    | 18 (90)                 | < 0.001                |
| On-treatment lung transplantation, n (%)                    |                       | 1 (2)                      | -                       | -                      |
| Time to on-treatment AE-IPF, weeks                          |                       | -                          | 14.9 (7.9 – 50.6)       | -                      |
| Duration of pirfenidone therapy, weeks                      |                       | 65.1 (26.3 – 136.0)        | 33.6 (14.2 – 59.8)      | 0.047                  |

Categorical data are presented as counts and percentages, and continuous variables are presented as means (±standard deviation) or medians (interquartile range) if non-normally distributed. AE-IPF, acute exacerbation of idiopathic pulmonary fibrosis; D<sub>LCO</sub>, diffusion capacity for carbon monoxide; FVC, forced vital capacity; GAP, gender, age, physiology. <sup>a</sup> P-value for the comparison between patients with and those without AE-IPF.

**Supplemental Table S2.** Cox proportional-hazards regression and subdistribution hazard regression on the risk of on-treatment acute exacerbation of idiopathic pulmonary fibrosis (AE-IPF) during the follow-up period.

| Plasma mucin-1 levels (ng/mL)            | Crude HR <sup>a</sup> of AE-IPF (95% CI) | <i>P</i> -value | Adjusted HR <sup>a</sup> of AE-IPF (95% CI) | <i>P</i> -value | Subdistribution HR <sup>b</sup> of AE-IPF (95% CI) | <i>P</i> -value |
|------------------------------------------|------------------------------------------|-----------------|---------------------------------------------|-----------------|----------------------------------------------------|-----------------|
| Dichotomous model:<br>≥ 2.5 versus < 2.5 | 10.49 (3.48 – 31.68)                     | < 0.001         | 14.07 (4.26 – 46.49)                        | < 0.001         | 10.85 (3.76 – 31.28)                               | < 0.001         |
| Subgroups based on the mucin-1 levels:   |                                          |                 |                                             |                 |                                                    |                 |
| < 1.5                                    | Reference group                          |                 | Reference group                             |                 | Reference group                                    |                 |
| ≥ 1.5 but < 2.5                          | 5.26 (0.54 – 51.20)                      | 0.153           | 7.85 (0.69 – 89.32)                         | 0.097           | 8.54 (0.63 – 116.42)                               | 0.110           |
| ≥ 2.5 but < 3.5                          | 11.78 (1.31 – 105.74)                    | 0.028           | 20.42 (2.04 – 204.25)                       | 0.010           | 15.69 (1.44 – 171.00)                              | 0.024           |
| ≥ 3.5                                    | 56.06 (6.96 – 451.33)                    | < 0.001         | 101.96 (10.43 – 996.47)                     | < 0.001         | 70.33 (8.01 – 617.13)                              | < 0.001         |

AE-IPF, (on-treatment) acute exacerbation of idiopathic pulmonary fibrosis; HR, hazard ratio; 95% CI, 95% confidence interval.

<sup>a</sup> Derived from single-variate and multi-variable Cox proportional hazard regression analysis; for the multi-variable analysis, the following covariables were incorporated for adjustment: gender-age-physiology (GAP) stages, smoking status, Charlson comorbidity index, echocardiographic evidence of pulmonary hypertension. <sup>b</sup> Derived from subdistribution hazard regression analysis that adjusted GAP stages, smoking status, Charlson comorbidity index, echocardiographic evidence of pulmonary hypertension, and further controlled for the competing risk of on-treatment severe adverse outcomes (SAO, including on-treatment lung transplantation and all-cause mortality).

**Supplemental Table S3.** Characteristics and outcomes of patients with and without on-treatment severe adverse outcomes (SAO) during the follow-up period.

| Baseline characteristics and outcomes                       |                       | Without SAO<br>(N = 39) | With SAO<br>(N = 31) | P – value <sup>a</sup> |
|-------------------------------------------------------------|-----------------------|-------------------------|----------------------|------------------------|
| Age, years                                                  |                       | 74.6 (± 9.5)            | 76.1 (± 9.6)         | 0.558                  |
| Sex                                                         | Female, n (%)         | 6 (15)                  | 6 (19)               | 0.754                  |
|                                                             | Male, n (%)           | 33 (85)                 | 25 (81)              |                        |
| Body mass index, kg/m <sup>2</sup>                          |                       | 24.0 (± 3.6)            | 23.0 (± 3.3)         | 0.287                  |
| Body surface area, m <sup>2</sup>                           |                       | 1.67 (± 0.17)           | 1.64 (± 0.15)        | 0.274                  |
| Cigarette smoking status                                    | Never smoker, n (%)   | 13 (33)                 | 12 (39)              | 0.656                  |
|                                                             | Current smoker, n (%) | 5 (13)                  | 2 (6)                |                        |
|                                                             | Former smoker, n (%)  | 21 (54)                 | 17 (55)              |                        |
| Charlson comorbidity index                                  |                       | 5 (4 – 7)               | 5 (4 – 6)            | 0.415                  |
| Echocardiographic evidence of pulmonary hypertension, n (%) |                       | 21 (54)                 | 14 (45)              | 0.631                  |
| Baseline plasma mucin-1 level, ng/mL                        |                       | 0.96 (0.62 – 1.70)      | 2.98 (1.79 – 4.16)   | < 0.001                |
| Patients with SAO < 2 years                                 |                       |                         | 3.53 (2.12 – 5.14)   | < 0.001                |
| Patients with SAO ≥ 2 year                                  |                       |                         | 2.40 (1.53 – 3.10)   | 0.050                  |
| Baseline FVC, L                                             |                       | 2.07 (± 0.46)           | 1.87 (± 0.54)        | 0.094                  |
| Baseline FVC, % prediction                                  |                       | 68 (± 10)               | 63 (± 12)            | 0.061                  |
| Baseline D <sub>LCO</sub> , mmol/min/kPa                    |                       | 3.02 (± 1.20)           | 2.33 (± 1.17)        | 0.027                  |
| Baseline D <sub>LCO</sub> , % prediction                    |                       | 55 (± 21)               | 49 (± 24)            | 0.165                  |
| Stages based on the GAP index                               | Stage 1, n (%)        | 8 (21)                  | 5 (16)               | 0.229                  |
|                                                             | Stage 2, n (%)        | 27 (69)                 | 18 (58)              |                        |
|                                                             | Stage 3, n (%)        | 4 (10)                  | 8 (26)               |                        |
| Dosing Low (1200 mg/day), n (%)                             |                       | 24 (62)                 | 16 (52)              | 0.470                  |
| High (1800 mg/day), n (%)                                   |                       | 15 (38)                 | 15 (48)              |                        |
| On-treatment AE-IPF, n (%)                                  |                       | 2 (5)                   | 18 (58)              | < 0.001                |
| On-treatment death, n (%)                                   |                       | -                       | 30 (97)              | -                      |
| Due to AE-IPF, n (%)                                        |                       | -                       | 12 (39)              | -                      |
| Due to IPF progression, n (%)                               |                       | -                       | 8 (27)               | -                      |
| Due to infectious pneumonia, n (%)                          |                       | -                       | 5 (16)               | -                      |
| Due to extra-pulmonary infection, n (%)                     |                       | -                       | 2 (6)                | -                      |
| Due to cardiovascular events, n (%)                         |                       | -                       | 2 (6)                | -                      |
| Due to extrapulmonary cancer, n (%)                         |                       | -                       | 1 (3)                | -                      |
| On-treatment lung transplantation, n (%)                    |                       | -                       | 1 (3)                | -                      |
| Time to on-treatment SAO, weeks                             |                       | -                       | 52.6 (15.0 – 112.6)  | -                      |
| Duration of pirfenidone therapy, weeks                      |                       | 60.4 (29.4 – 143.1)     | 55.7 (15.0 – 110.3)  | 0.277                  |

Categorical data are presented as counts and percentages, and continuous variables are presented as means (±standard deviation) or medians (interquartile range) if non-normally distributed. AE-IPF, acute exacerbation of idiopathic pulmonary fibrosis; D<sub>LCO</sub>, diffusion capacity for carbon monoxide; FVC, forced vital capacity; GAP, gender, age,

physiology; SAO, severe adverse outcomes (including on-treatment lung transplantation and all-cause mortality).

<sup>a</sup> *P*-value for the comparison between patients with and those without SAO.

---

**Supplemental Table S4.** Cox proportional-hazards regression on the risk of on-treatment *early* severe adverse outcomes (SAO) within 2 years of pirfenidone treatment.

| Plasma mucin-1 levels (ng/mL)             | Crude HR <sup>a</sup> of SAO<br>within 2 years (95% CI) | <i>P</i> -value | Adjusted HR <sup>a</sup> of SAO<br>within 2 years (95% CI) | <i>P</i> -value |
|-------------------------------------------|---------------------------------------------------------|-----------------|------------------------------------------------------------|-----------------|
| Dichotomous model:<br>≥ 2.5 versus < 2.5  | 5.91 (2.30 – 15.18)                                     | < 0.001         | 7.87 (2.86 – 21.70)                                        | < 0.001         |
| Subgroups based on the mucin-1<br>levels: |                                                         |                 |                                                            |                 |
| < 1.5                                     | Reference group                                         |                 | Reference group                                            |                 |
| ≥ 1.5 but < 2.5                           | 3.93 (0.72 – 21.48)                                     | 0.114           | 3.26 (0.56 – 19.07)                                        | 0.190           |
| ≥ 2.5 but < 3.5                           | 7.36 (1.43 – 37.95)                                     | 0.017           | 8.25 (1.56 – 43.66)                                        | 0.013           |
| ≥ 3.5                                     | 16.44 (3.61 – 74.84)                                    | < 0.001         | 26.56 (4.99 – 141.33)                                      | < 0.001         |

HR, hazard ratio; SAO, severe adverse outcomes (including on-treatment lung transplantation and all-cause mortality); 95% CI, 95% confidence interval.

<sup>a</sup>Derived from single-variate and multi-variable Cox proportional hazard regression analysis; for the multi-variable analysis, the following covariables were incorporated for adjustment: gender-age-physiology (GAP) stages, smoking status, Charlson comorbidity index, and echocardiographic evidence of pulmonary hypertension.

**Supplemental Table S5.** Cox proportional-hazards regression on the risk of on-treatment severe adverse outcomes (SAO) anytime during the follow-up period.

| Plasma mucin-1 levels (ng/mL)             | Crude HR <sup>a</sup> of<br>SAO (95% CI) | <i>P</i> -value | Adjusted HR <sup>a</sup> of<br>SAO (95% CI) | <i>P</i> -value |
|-------------------------------------------|------------------------------------------|-----------------|---------------------------------------------|-----------------|
| Dichotomous model:<br>≥ 2.5 versus < 2.5  | 4.07 (1.94 – 8.53)                       | < 0.001         | 4.68 (2.11 – 10.39)                         | < 0.001         |
| Subgroups based on the mucin-1<br>levels: |                                          |                 |                                             |                 |
| < 1.5                                     | Reference group                          |                 | Reference group                             |                 |
| ≥ 1.5 but < 2.5                           | 2.75 (0.80 – 9.49)                       | 0.109           | 2.35 (0.65 – 8.51)                          | 0.193           |
| ≥ 2.5 but < 3.5                           | 5.33 (1.60 – 17.81)                      | 0.007           | 6.17 (1.79 – 21.23)                         | 0.004           |
| ≥ 3.5                                     | 8.53 (2.72 – 26.73)                      | < 0.001         | 8.18 (2.43 – 27.55)                         | < 0.001         |

HR, hazard ratio; SAO, severe adverse outcomes (including on-treatment lung transplantation and all-cause mortality); 95% CI, 95% confidence interval.

<sup>a</sup> Derived from single-variate and multi-variable Cox proportional hazard regression analysis; for the multi-variable analysis, the following covariables were incorporated for adjustment: gender-age-physiology (GAP) stages, smoking status, Charlson comorbidity index, and echocardiographic evidence of pulmonary hypertension.



**Supplemental Table S6.** Sensitivity analysis replacing “GAP stages” in all the multi-variable models with its individual constituting variables (sex, age, FVC, D<sub>LCO</sub>).

| <b>Plasma mucin-1 levels (ng/mL)</b>     | <b>Adjusted HR<sup>a</sup> for AE-IPF (95% CI)</b>             | <b>P-value</b> | <b>Subdistribution HR<sup>b</sup> for AE-IPF (95% CI)</b> | <b>P-value</b> |
|------------------------------------------|----------------------------------------------------------------|----------------|-----------------------------------------------------------|----------------|
| Dichotomous model:<br>≥ 2.5 versus < 2.5 | 21.84 (3.90 – 122.16)                                          | < 0.001        | 14.34 (3.03 – 67.96)                                      | < 0.001        |
| Subgroups based on mucin-1 levels:       |                                                                |                |                                                           |                |
| < 1.5                                    | Reference group                                                |                | Reference group                                           |                |
| ≥ 1.5 but < 2.5                          | 5.17 (0.37 – 72.42)                                            | 0.222          | 8.07 (0.43 – 149.89)                                      | 0.160          |
| ≥ 2.5 but < 3.5                          | 48.30 (1.96 – 1191.26)                                         | 0.018          | 52.73 (2.06 – 1346.69)                                    | 0.016          |
| ≥ 3.5                                    | 70.25 (4.48 – 1100.84)                                         | 0.002          | 55.97 (3.58 – 874.42)                                     | 0.004          |
| <b>Plasma mucin-1 levels (ng/mL)</b>     | <b>Adjusted HR<sup>c</sup> for SAO (95% CI)</b>                |                | <b>P-value</b>                                            |                |
| Dichotomous model:<br>≥ 2.5 versus < 2.5 | 3.47 (1.55 – 7.78)                                             |                | 0.002                                                     |                |
| Subgroups based on mucin-1 levels:       |                                                                |                |                                                           |                |
| < 1.5                                    | Reference group                                                |                | Reference group                                           |                |
| ≥ 1.5 but < 2.5                          | 1.55 (0.40 – 5.94)                                             |                | 0.525                                                     |                |
| ≥ 2.5 but < 3.5                          | 4.17 (1.07 – 16.18)                                            |                | 0.039                                                     |                |
| ≥ 3.5                                    | 4.75 (1.10 – 20.59)                                            |                | 0.037                                                     |                |
| <b>Plasma mucin-1 levels (ng/mL)</b>     | <b>Adjusted HR<sup>c</sup> for SAO within 2 years (95% CI)</b> |                | <b>P-value</b>                                            |                |
| Dichotomous model:<br>≥ 2.5 versus < 2.5 | 4.67 (1.65 – 13.24)                                            |                | 0.004                                                     |                |
| Subgroups based on mucin-1 levels:       |                                                                |                |                                                           |                |
| < 1.5                                    | Reference group                                                |                | Reference group                                           |                |
| ≥ 1.5 but < 2.5                          | 2.46 (0.39 – 15.76)                                            |                | 0.341                                                     |                |
| ≥ 2.5 but < 3.5                          | 4.40 (0.67 – 29.11)                                            |                | 0.124                                                     |                |
| ≥ 3.5                                    | 13.27 (2.08 – 84.85)                                           |                | 0.006                                                     |                |

AE-IPF, (on-treatment) acute exacerbation of idiopathic pulmonary fibrosis; HR, hazard ratio; 95% CI, 95% confidence interval. <sup>a</sup> Derived from multi-variable Cox proportional hazard regression analysis incorporating the following covariables: sex, age, forced vital capacity (FVC, in % prediction), diffusion capacity of the lung for carbon monoxide (D<sub>LCO</sub>, in % prediction), Charlson comorbidity index (CCI), smoking status, and echocardiographic evidence of pulmonary hypertension. <sup>b</sup> Derived from subdistribution hazard regression analysis that adjusted sex, age, FVC (in % prediction), D<sub>LCO</sub> (in % prediction), CCI, smoking status, and echocardiographic evidence of pulmonary hypertension. <sup>c</sup> Derived from multi-variable Cox proportional hazard regression analysis incorporating the following covariables: sex, age, FVC (in % prediction), D<sub>LCO</sub> (in % prediction), CCI, smoking status, and echocardiographic evidence of pulmonary hypertension.

**Supplemental Figure S1.** Sensitivity analyses of the multi-variable Cox proportional hazards regression models for the risk of acute exacerbation of idiopathic pulmonary fibrosis (AE-IPF).

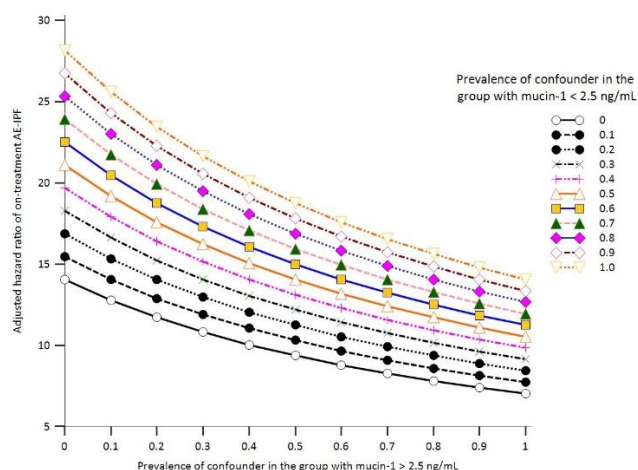

**Supplemental Figure S1a**

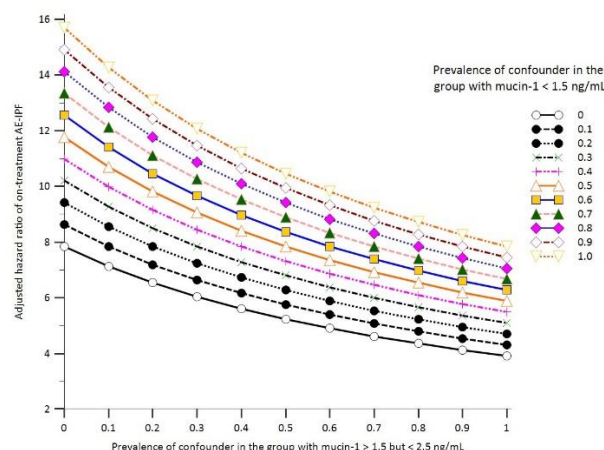

**Supplemental Figure S1b**

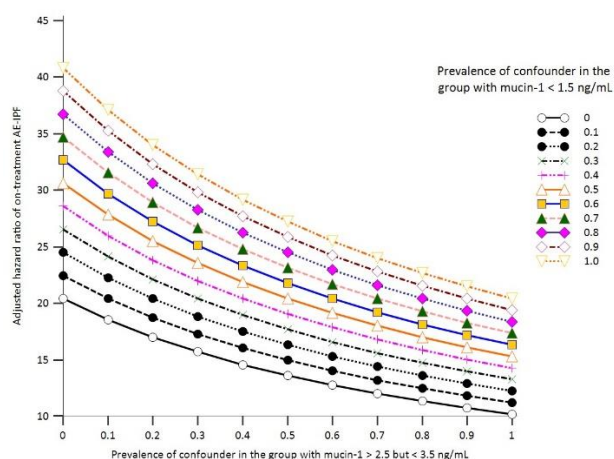

**Supplemental Figure S1c**

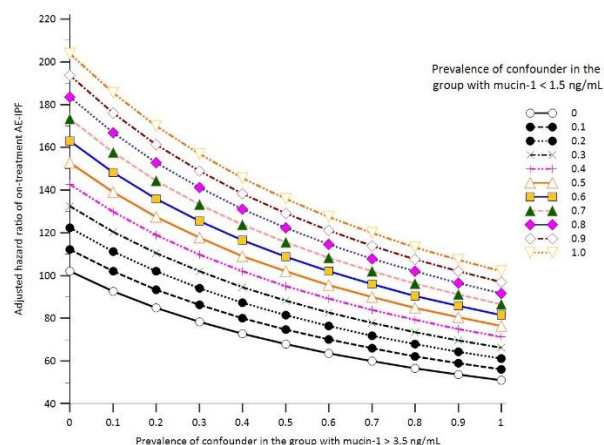

**Supplemental Figure S1d**

**Supplemental Figure S1. Explanation:**

Results of the sensitivity analyses as presented graphically above show that regardless of the prevalence of the potentially unidentified confounder: (a) baseline plasma mucin-1 level  $\geq 2.5$  ng/mL is still a significant predictor of on-treatment AE-IPF; the incremental trend in adjusted hazard ratios of AE-IPF persists across subgroups of increasing levels of plasma mucin-1 (b)  $\geq 1.5$  but  $< 2.5$ ; (c)  $\geq 2.5$  but  $< 3.5$ ; (d)  $\geq 3.5$ ; ng/mL. For example, as in Supplemental Figure S1a, when hypothetically all the patients with baseline mucin-1  $< 2.5$  ng/mL have the potentially unidentified confounder (and the prevalence of this confounder was therefore 1.0, as represented by the top orange broken line with hallow-triangular markers), but none of the patients with baseline mucin-1  $\geq 2.5$  ng/mL have this unidentified confounder (and thus the prevalence of this confounder was 0), then having baseline mucin-1  $\geq 2.5$  ng/mL would still be a significant predictor of AE-IPF (with the adjusted hazard ratio = 28.15). Sensitivity analyses were performed using R (Version 3.6.3) and the packages *survival* and *obsSens*; the graphs were plotted using MedCal (Version 20.118).

**Supplemental Figure S1. Abbreviation:** AE-IPF, acute exacerbation of idiopathic pulmonary fibrosis.

**Supplemental Figure S2.** Sensitivity analyses of the multi-variable Cox proportional hazards regression models for *early* severe adverse outcomes (SAO).

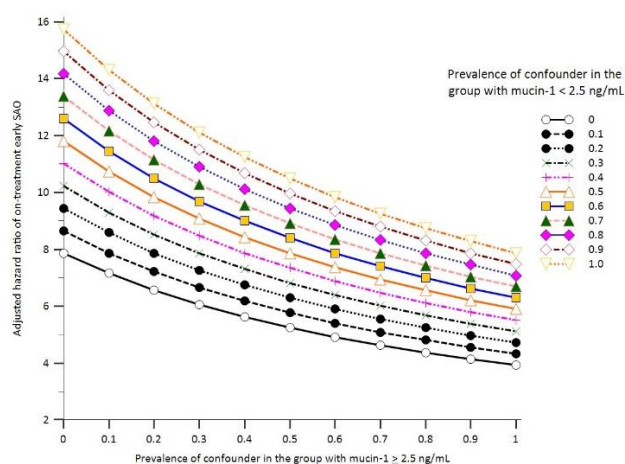

**Supplemental Figure S2a**

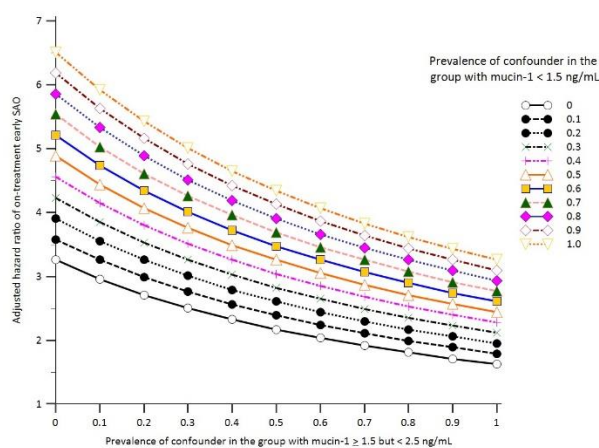

**Supplemental Figure S2b**

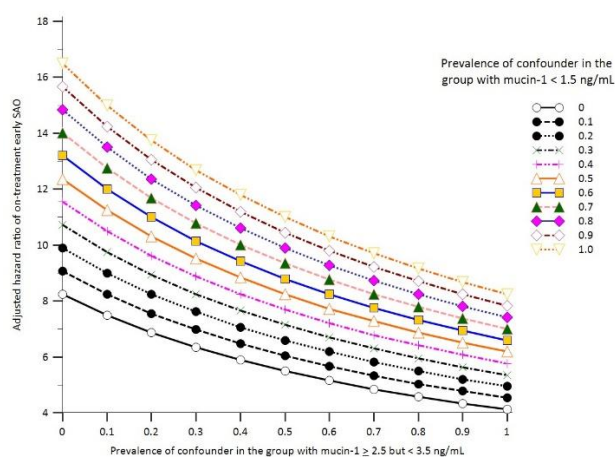

**Supplemental Figure S2c**

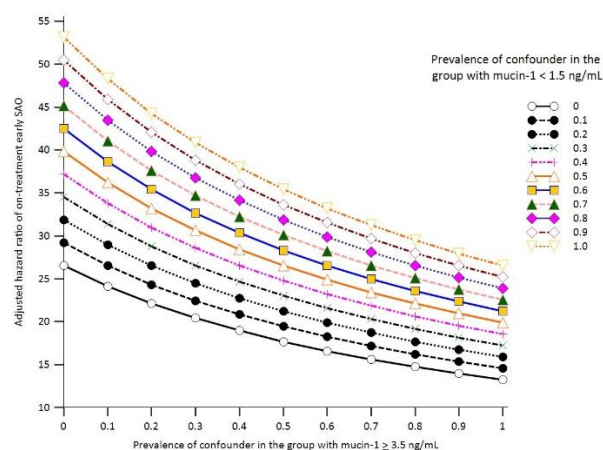

**Supplemental Figure S2d**

**Supplemental Figure S2. Explanation:**

Results of the sensitivity analyses as presented graphically above show that regardless of the prevalence of the potentially unidentified confounder: (a) baseline plasma mucin-1 level  $\geq 2.5$  ng/mL is still a significant predictor of on-treatment early SAO; the incremental trend in adjusted hazard ratios of early SAO persists across subgroups of increasing levels of plasma mucin-1 (b)  $\geq 1.5$  but  $< 2.5$ ; (c)  $\geq 2.5$  but  $< 3.5$ ; (d)  $\geq 3.5$ ; ng/mL. For example, as in Supplemental Figure S2a, when hypothetically all the patients with baseline mucin-1  $< 2.5$  ng/mL have the potentially unidentified confounder (and the prevalence of this confounder was therefore 1.0, as represented by the top orange broken line with hallow-triangular markers), but none of the patients with baseline mucin-1  $\geq 2.5$  ng/mL have this unidentified confounder (and thus the prevalence of this confounder was 0), then having baseline mucin-1  $\geq 2.5$  ng/mL would still be a significant predictor of SAO (with the adjusted hazard ratio = 15.74). Sensitivity analyses were performed using R (Version 3.6.3) and the packages *survival* and *obsSens*; the graphs were plotted using MedCal (Version 20.118).

**Supplemental Figure S2. Abbreviation:** SAO, severe adverse outcomes (including on-treatment lung transplantation and all-cause mortality).

**Supplemental Figure S3.** Sensitivity analyses of the multi-variable Cox proportional hazards regression models for the risk of severe adverse outcomes (SAO) anytime during the follow-up period.

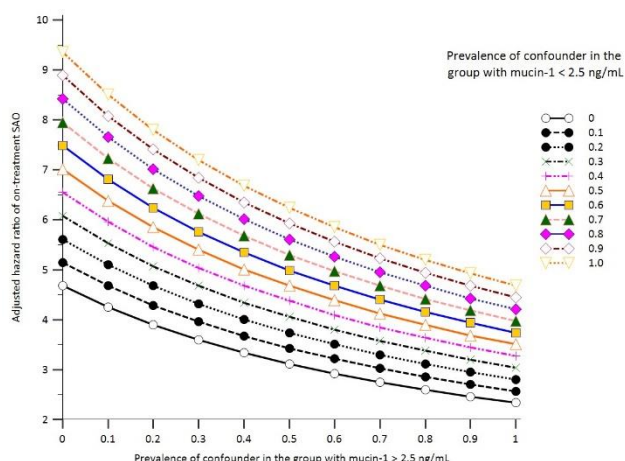

**Supplemental Figure S3a**

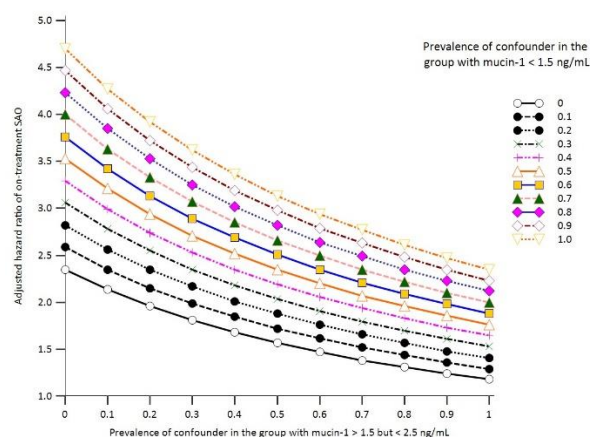

**Supplemental Figure S3b**

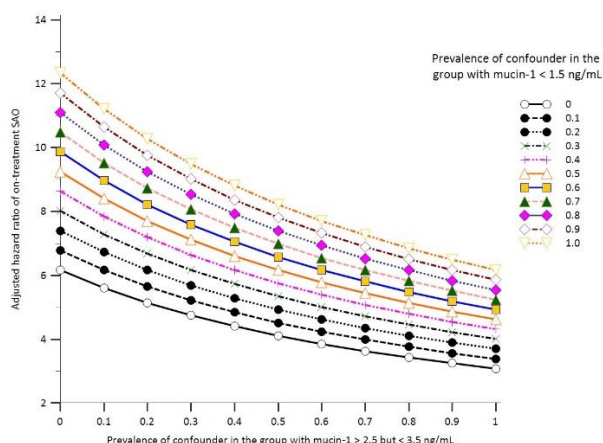

**Supplemental Figure S3c**

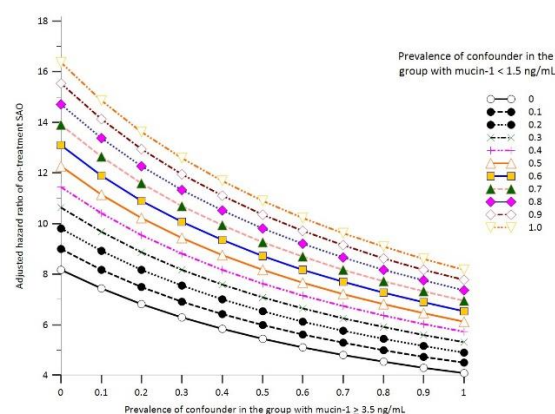

**Supplemental Figure S3d**

**Supplemental Figure S3. Explanation:**

Results of the sensitivity analyses as presented graphically above show that regardless of the prevalence of the potentially unidentified confounder: (a) baseline plasma mucin-1 level  $\geq 2.5$  ng/mL is still a significant predictor of on-treatment SAO; the incremental trend in adjusted hazard ratios of SAO persists across subgroups of increasing levels of plasma mucin-1 (b)  $\geq 1.5$  but  $< 2.5$ ; (c)  $\geq 2.5$  but  $< 3.5$ ; (d)  $\geq 3.5$ ; ng/mL. For example, as in Supplemental Figure S2a, when hypothetically all the patients with baseline mucin-1  $< 2.5$  ng/mL have the potentially unidentified confounder (and the prevalence of this confounder was therefore 1.0, as represented by the top orange broken line with hollow-triangular markers), but none of the patients with baseline mucin-1  $\geq 2.5$  ng/mL have this unidentified confounder (and thus the prevalence of this confounder was 0), then having baseline mucin-1  $\geq 2.5$  ng/mL would still be a significant predictor of SAO (with the adjusted hazard ratio = 9.36). Sensitivity analyses were performed using R (Version 3.6.3) and the packages *survival* and *obsSens*; the graphs were plotted using MedCal (Version 20.118).

**Supplemental Figure S3. Abbreviation:** SAO, severe adverse outcomes (including on-treatment lung transplantation and all-cause mortality).

**Appendix S1.** Formulae for the calculation of rates of changes in pulmonary functional parameters.

1. Calculation of 24-week rate of change:

$$(1) [(FVC_B - FVC_A) / (\text{time between test A and test B in weeks})] \times 24$$

$$(2) [(D_{LCO}_B - D_{LCO}_A) / (\text{time between test A and test B in weeks})] \times 24$$

2. Calculation of annualized (52-week) rate of change:

$$(1) [(FVC_B - FVC_A) / (\text{time between test A and test B in weeks})] \times 52$$

$$(2) [(D_{LCO}_B - D_{LCO}_A) / (\text{time between test A and test B in weeks})] \times 52$$

**Note:** FVC represents forced vital capacity and  $D_{LCO}$  represents diffusion capacity for carbon monoxide. The subscript “A” indicates measurements that were closest in time before the initiation of pirfenidone treatment, and the subscript “B” indicates measurements that were closest in time before or within 28 days after the last dose of pirfenidone (for patients who prematurely discontinued the treatment) or September 30, 2023 (for patients who continued the treatment).
